# Supplementary material for: A Single Amino Acid Substitution in Porcine Reproductive and Respiratory Syndrome Virus Glycoprotein 2 Significantly Impairs Its Infectivity in Macrophages
Source: MDPI journal article supplement (doi:10.3390/v14122822), 2022-12-18
Supplement: s1 [file s1]

Figure S1

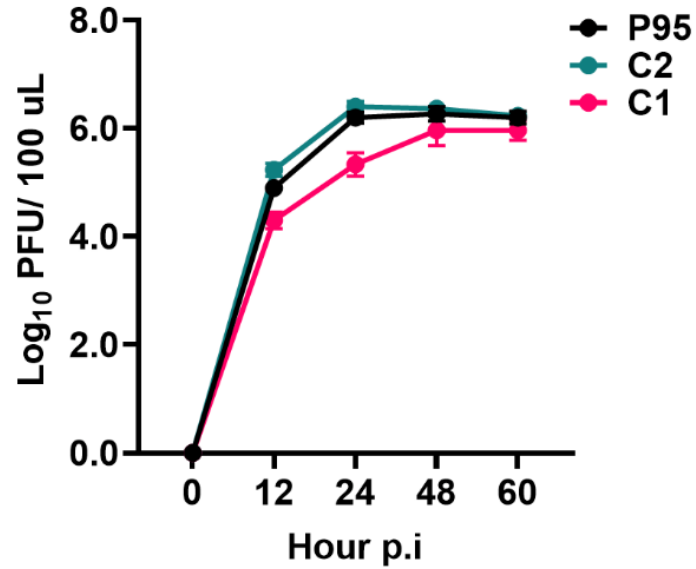

**Figure S1.** Multistep growth curve of NCV1 P95 and its derived plaque-clones in MARC-145 cells. MARC-145 cells in 24-well plates were inoculated with indicated viruses at a MOI of 0.1. Samples of culture supernatants were collected at indicated time points post-infection and virus titers were determined by a plaque assay in MARC-145 cells. Data are expressed as mean  $\pm$  SEM of the three independent experiments.

Figure S2

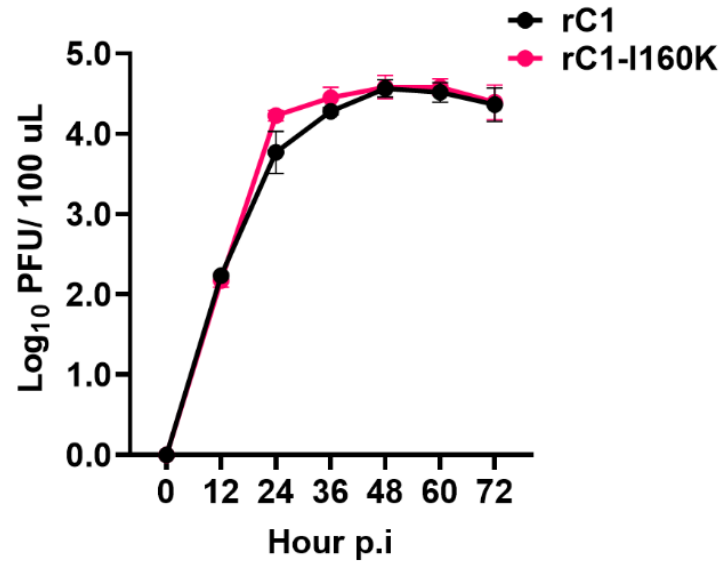

**Figure S2.** Multistep growth curve of rNCV1 and rNCV1-I160K mutant. MARC-145 cells in 24-well plates were inoculated with indicated viruses at a MOI of 0.1. Samples of culture supernatants were collected at indicated time points post-infection and virus titers were determined by a plaque assay in MARC-145 cells. Data are expressed as mean  $\pm$  SEM of the three independent experiments.

Figure S3

**A**

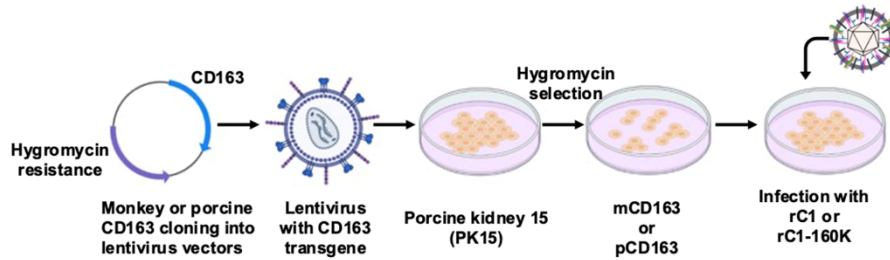

**B**

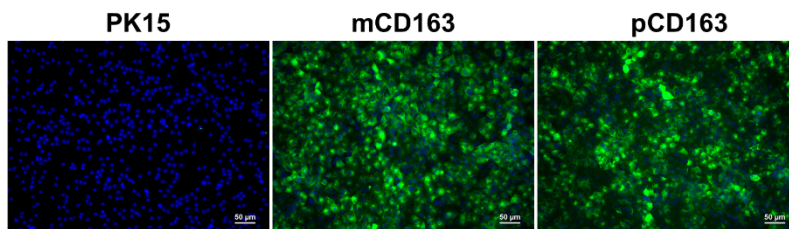

**C**

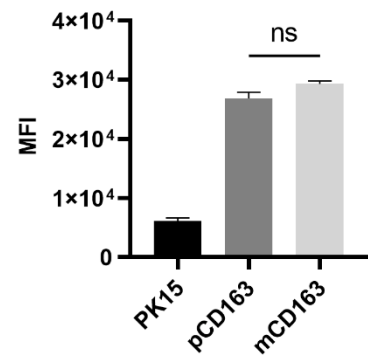

**Figure S3.** Generation of PK15 cell line expressing pCD163 or mCD163. (A) CD163 sequence of both species were cloned independently into the lentivirus vector. Recombinant Lentiviruses carrying either pCD163 or mCD163 were harvested from the culture supernatant of HEK-293T cells transfected with lentivirus vector plasmid and packaging plasmid. PK15 cells were transduced with the recombinant lentiviruses and non-transduced cells were killed with hygromycin B selection antibiotic (100ug/ml). Four round of cell passage was performed under the hygromycin B selection pressure before the cell uses in infection studies. (B) Immunofluorescence visualization of a CD163 protein expression. The pCD163 and mCD163 was detected with an anti-CD163 primary antibody. DAPI was used to stain the nuclei. Scale bar = 50. (C) Mean fluorescence intensity (MFI) of pCD163 or mCD163 expression on transduced PK15 cells.

Figure S4

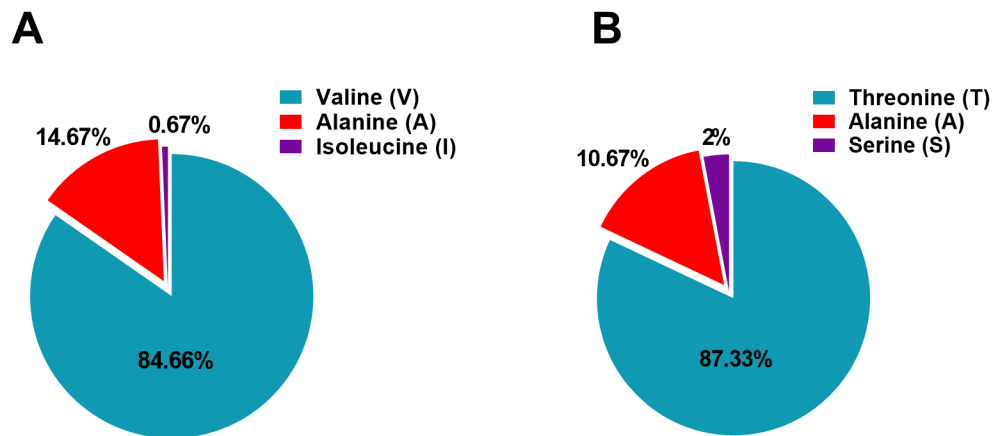

**Figure S4.** Frequency of unwanted mutations in rNCV13-K160I virus detected in natural PRRSV strains. The open reading frame 1ab amino acid sequence of rNCV13-K160I was BLAST and top 150 sequences were aligned using multiple sequence alignment tool. Shown are pie-charts showing the percentage of amino acid residues found at position 462 (A) and 718 (B) in poly protein 1ab protein.

Figure S5

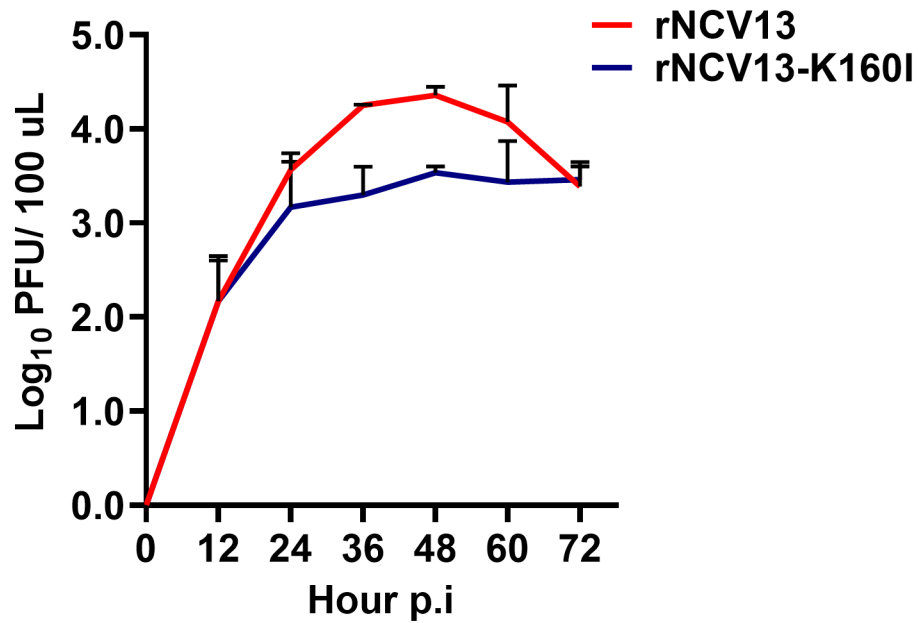

**Figure S5.** Multistep growth curve of rNCV13 and rNCV13-K160I mutant. MARC-145 cells in 24-well plates were inoculated with indicated viruses at a MOI of 0.1 per cell. Samples of culture supernatants were collected at indicated time points post-infection and virus titers were determined by a plaque assay in MARC-145 cells. Data are expressed as mean  $\pm$  SEM of the three independent experiments.

**Table S1.** Mutations common in the P95, C1, and C2 viruses

| Nucleotide position <sup>a</sup> | Nucleotide change | Protein affected | Amino acid position <sup>b</sup> | Amino acid change |
|----------------------------------|-------------------|------------------|----------------------------------|-------------------|
| 1830                             | C→T               | nsp2             | 610                              | Silent            |
| 1848                             | G→A               | nsp2             | 616                              | Silent            |
| 2045                             | T→C               | nsp2             | 682                              | V→A               |
| 2444                             | C→T               | nsp2             | 815                              | T→I               |
| 2565                             | A→G               | nsp2             | 855                              | Silent            |
| 2618                             | T→C               | nsp2             | 873                              | V→A               |
| 2915                             | C→T               | nsp2             | 972                              | T→I               |
| 3201                             | C→T               | nsp2             | 1067                             | Silent            |
| 3696                             | C→T               | nsp2             | 1232                             | Silent            |
| 3872                             | A→G               | nsp2             | 1291                             | Silent            |
| 4752                             | T→C               | nsp3             | 1584                             | Silent            |
| 4831                             | T→C               | nsp3             | 1611                             | I→T               |
| 6102                             | C→T               | nsp5             | 2034                             | Silent            |
| 6103                             | T→C               | nsp5             | 2035                             | Silent            |
| 6116                             | A→G               | nsp5             | 2039                             | Silent            |
| 6182                             | A→G               | nsp6             | 2061                             | Silent            |
| 6185                             | C→T               | nsp6             | 2062                             | Silent            |
| 6191                             | G→C               | nsp6             | 2064                             | Silent            |
| 6227                             | G→C               | nsp7             | 2076                             | M→I               |
| 6235                             | A→G               | nsp7             | 2079                             | N→D               |
| 6514                             | A→G               | nsp7             | 2172                             | S→G               |
| 6627                             | T→C               | nsp7             | 2209                             | Silent            |
| 7277                             | A→G               | nsp9             | 2426                             | Silent            |
| 7520                             | A→G               | nsp9             | 2507                             | Silent            |
| 7775                             | C→T               | nsp9             | 2592                             | Silent            |
| 8770                             | G→A               | nsp9             | 2924                             | R→K               |
| 9393                             | T→C               | nsp10            | 3132                             | Y→H               |

|       |     |                                 |      |        |
|-------|-----|---------------------------------|------|--------|
| 9482  | T→C | nsp10                           | 3161 | Silent |
| 9502  | A→G | nsp10                           | 3168 | Silent |
| 9557  | C→T | nsp10                           | 3219 | Silent |
| 9692  | C→T | nsp10                           | 3231 | Silent |
| 10028 | T→C | nsp10                           | 3343 | Silent |
| 10205 | T→C | nsp10                           | 3402 | Silent |
| 10535 | A→G | nsp11                           | 3512 | Silent |
| 10661 | A→G | nsp11                           | 3554 | Silent |
| 11099 | A→G | nsp12                           | 3700 | Silent |
| 11206 | A→G | nsp12                           | 3736 | K→R    |
| 11425 | C→T | nsp12                           | 3809 | A→V    |
| 11460 | G→A | nsp12                           | 3854 | V→I    |
| 11463 | A→G | nsp12                           | 3822 | I→V    |
| 11519 | G→T | GP2                             | 10   | L→F    |
| 11781 | A→C | GP2                             | 98   | I→L    |
| 11853 | T→G | GP2                             | 121  | H→Q    |
| 11859 | A→G | GP2                             | 123  | Silent |
| 11861 | G→A | GP2                             | 124  | Silent |
| 12024 | T→C | GP2                             | 178  | Silent |
| 12425 | G→A | GP3                             | 105  | A→T    |
| 13202 | A→G | GP4-GP5<br>intergenic<br>region |      | Silent |
| 13298 | A→G | GP5                             | 32   | N→D    |
| 13461 | C→T | GP5                             | 86   | H→Y    |
| 13694 | G→A | GP5                             | 164  | G→R    |
| 14576 | C→T | N                               | 90   | Silent |

<sup>a</sup>Nucleotide positions are based on PRRSV NCV-1 genome (GeneBank accession number ON950548)

<sup>b</sup>For nonstructural proteins (nsp2-nsp12), amino acid positions refer to the polyprotein pp1ab sequence of PRRSV NCV-1.
